# Supplementary material for: Scutellarin Suppresses Patient-Derived Xenograft Tumor Growth by Directly Targeting AKT in Esophageal Squamous Cell Carcinoma
Source: Oxford University Press journal article supplement (doi:10.1158/1940-6207.capr-19-0244), 2019-09-25
Supplement: 19406207capr190244-sup-222135_2_supp_5775474_pyc9zp.docx [file 19406207capr190244-sup-222135_2_supp_5775474_pyc9zp.docx]

**SUPPLEMENTARY FIGURE LEGENDS**

**Supplementary Figure 1.** Chemical structure of scutellarin.

**Supplemental Figure 2.** The effect of scutellarin on mouse body weight. Mice were orally administered scutellarin (50 or 100 mg/kg B.W.) or vehicle for 16 days. Data are shown as means ± S.E. of values obtained from the experimental groups.

**Supplementary Figure 3.** Expression of phosphorylated or total AKT in ESCC tissues.EG9, EG30, or HEG41ESCC tissues were immunoblotted with antibodies to detect phosphorylated or total AKT.

**Supplementary Figure 4.** Assessing the toxicity of scutellarin *in vivo*.Hematoxylin & eosin (H&E) stainingof (A) kidney, (B) liver, and (C) spleen tissues. Treated or untreated mouse kidney, liver, or spleen tissues were stained with H&E.
